# Supplementary material for: High performance poly(urethane-co-amide) from CO2-based dicarbamate: an alternative to long chain polyamide
Source: PubMed Central journal article supplement — RSC Adv. 2019 Aug 20;9(45):26080–90. doi: 10.1039/c9ra04646a (PMC9070367; doi:10.1039/c9ra04646a), 2019-08-20
Supplement: RA-009-C9RA04646A-s001.pdf [file RA-009-C9RA04646A-s001.pdf]

## Supplementary material

### High Performance Poly(urethane-co-amide) from CO<sub>2</sub>-based Dicarbamate: An Alternative to Long Chain Polyamide

Jiaxiang Qin, Junqiao Jiang, Shuxian Ye, Shuanjin Wang, Min Xiao, Youji Tao, Ganxin Jie, and Yuezhong Meng

**Table S1** Abbreviations and structure of some important compounds in this manuscript

| Abbreviations | Structure                                                                            |
|---------------|--------------------------------------------------------------------------------------|
| HDA           | 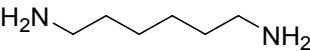   |
| ODA           |   |
| DDA           |  |
| CL            |   |
| BATMS         |  |
| HDC           |  |
| ODC           |  |
| DDC           |  |

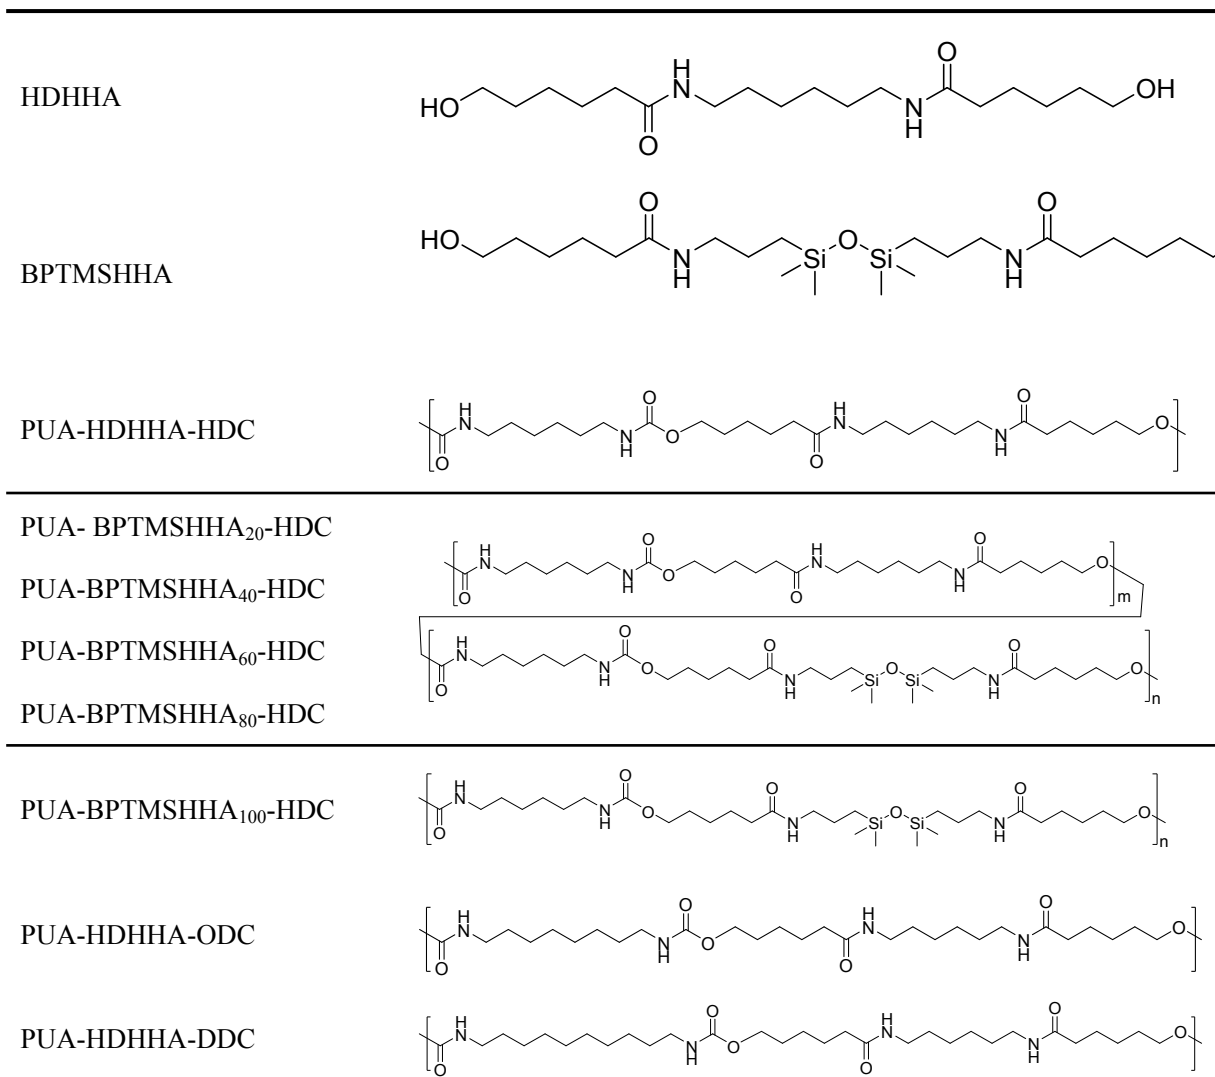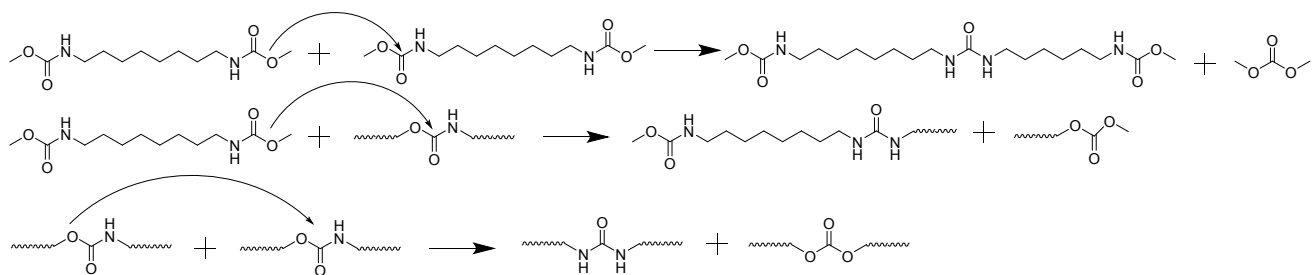

**Scheme S1** Urea Formation by carbamate-carbamate, carbamate-urethane segment, and urethane-urethane segment transurethane reactions

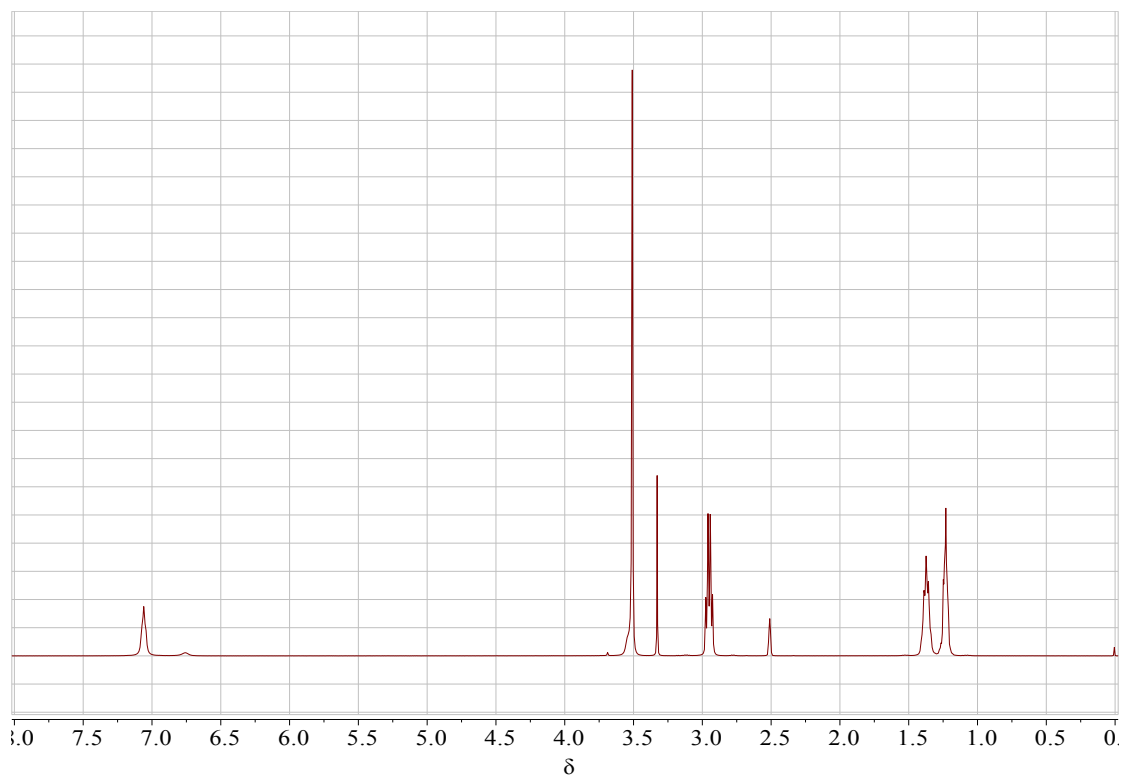

**Fig. S1** <sup>1</sup>H-NMR spectrum for HDC

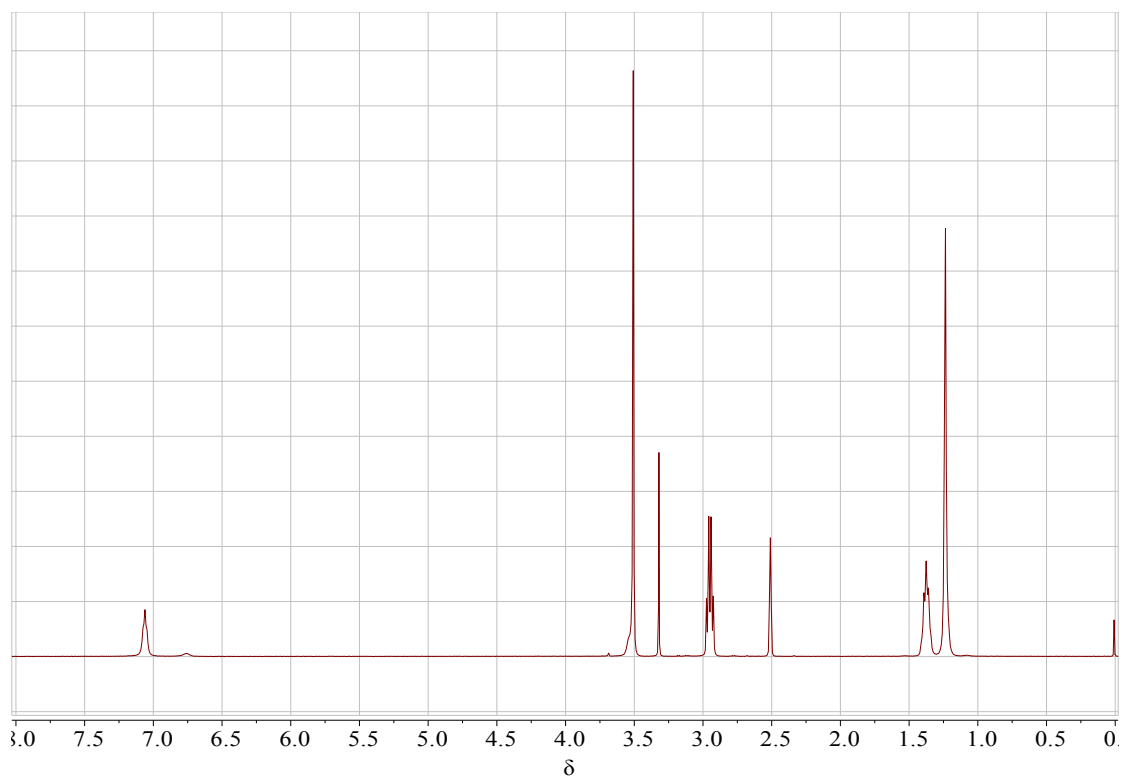

**Fig. S2** <sup>1</sup>H-NMR spectrum for ODC

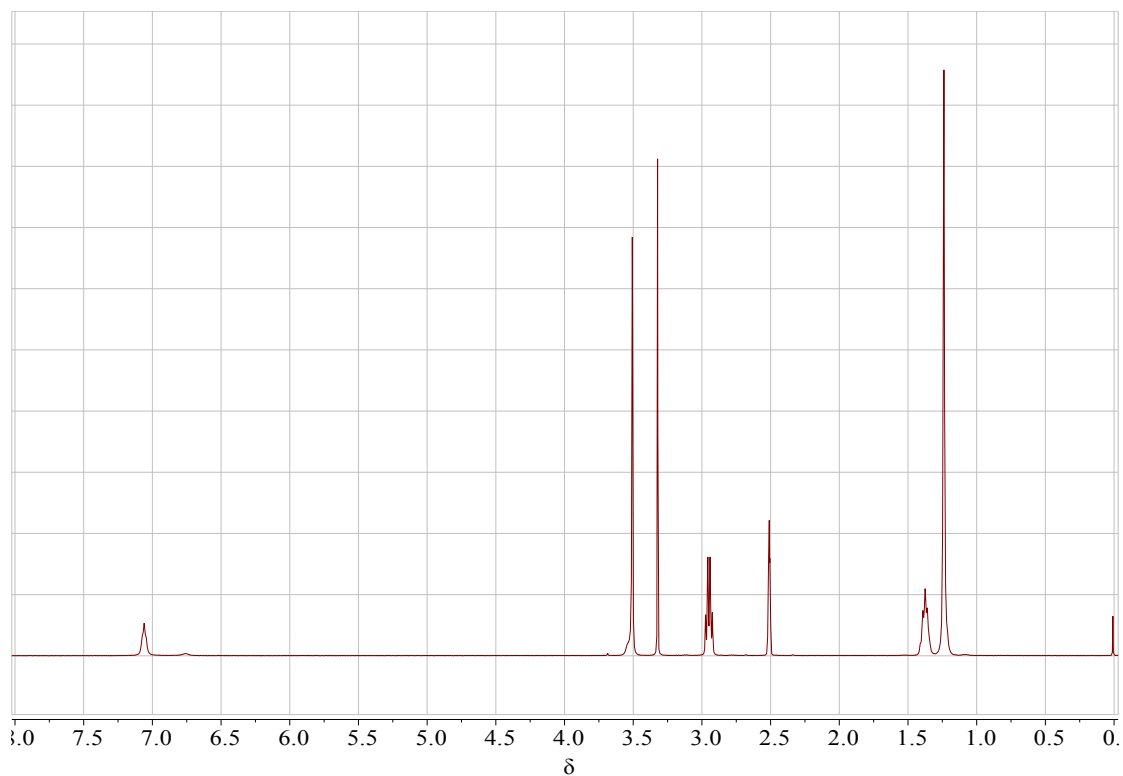

Fig. S3 <sup>1</sup>H-NMR spectrum for DDC

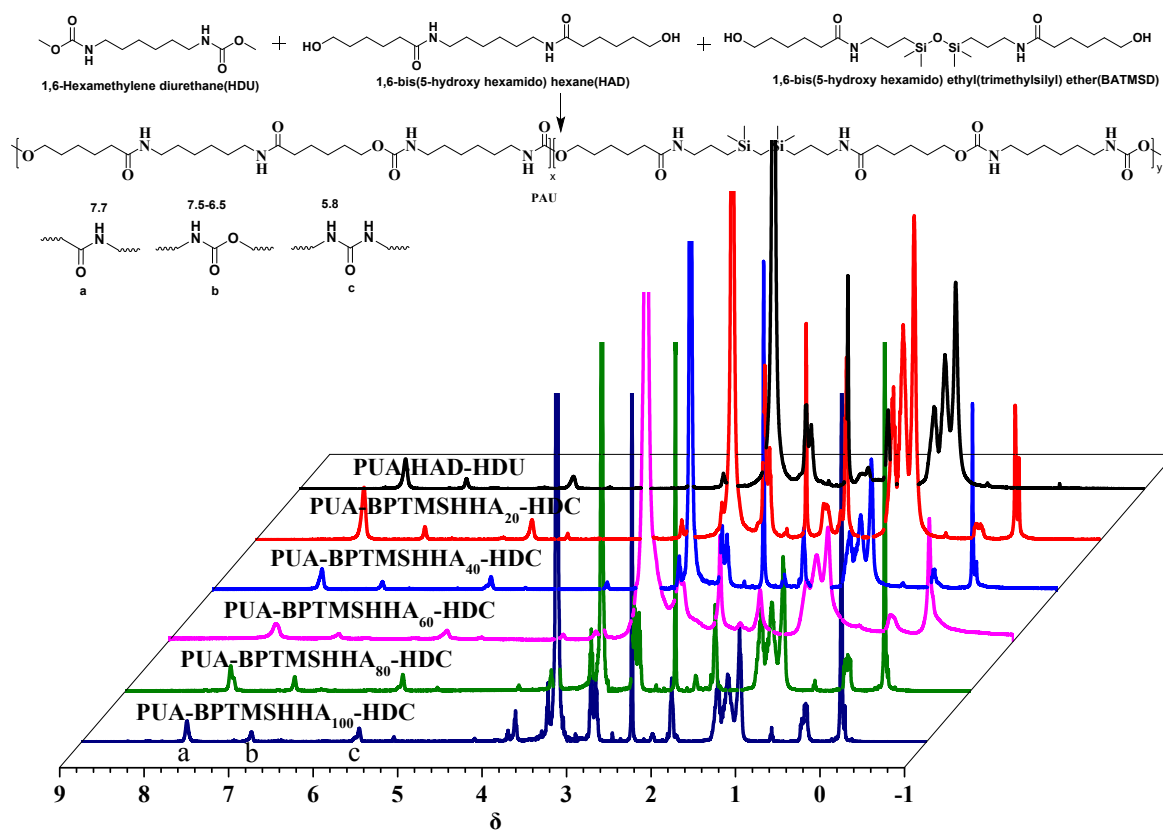

Fig. S4 <sup>1</sup>H-NMR spectra of PUAs from two different diamide diol and HDC

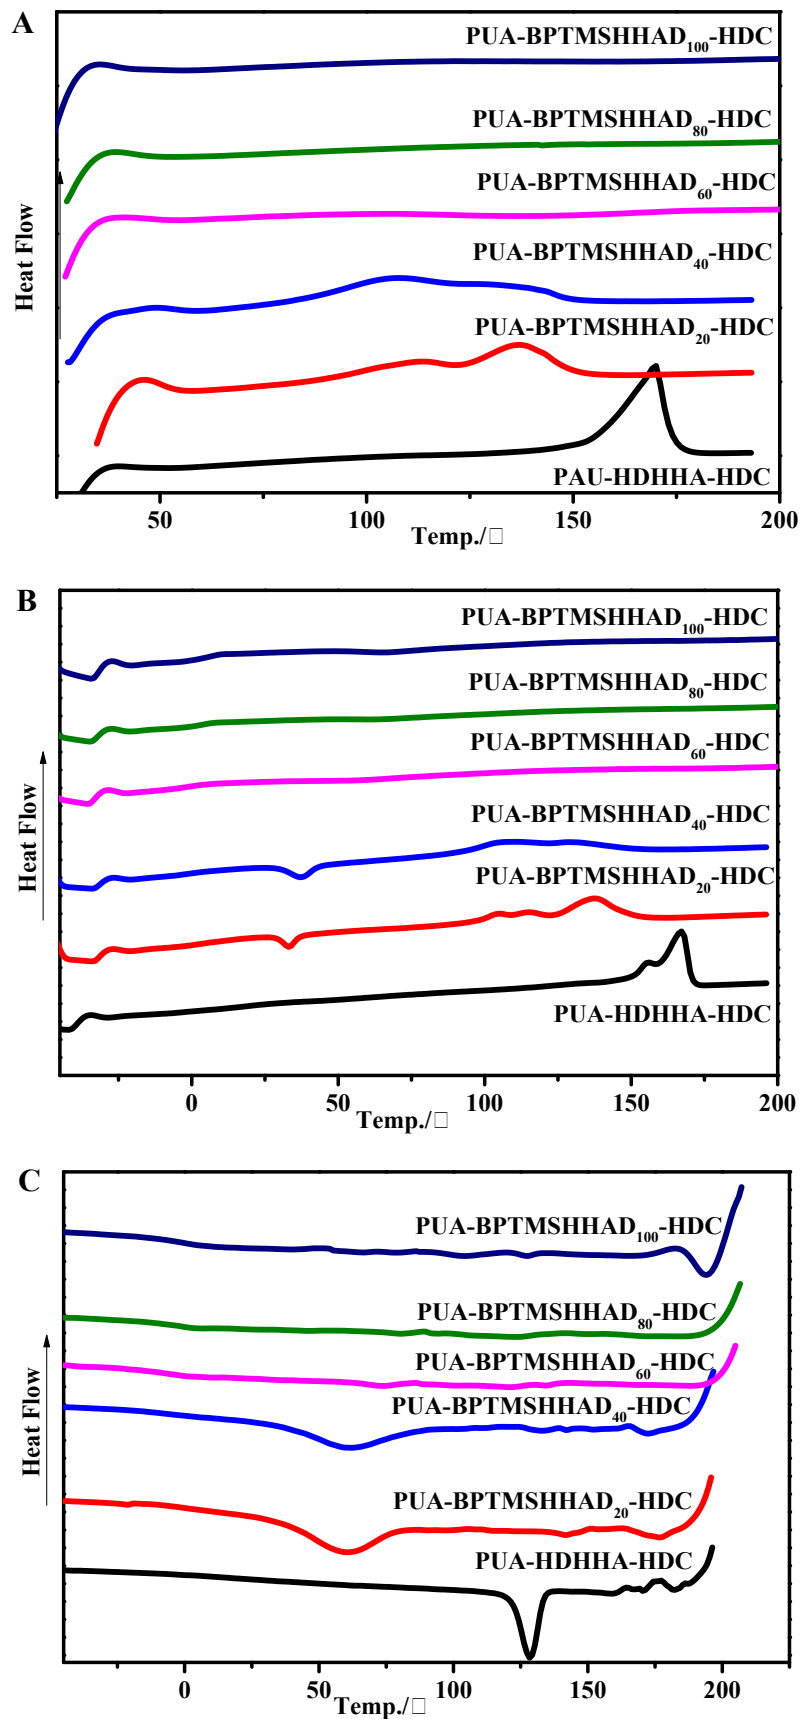

Fig. S5 DSC curves of PUAs from two diamides and HDC: (A) First heating run (B) Second heating run (C) Cooling run

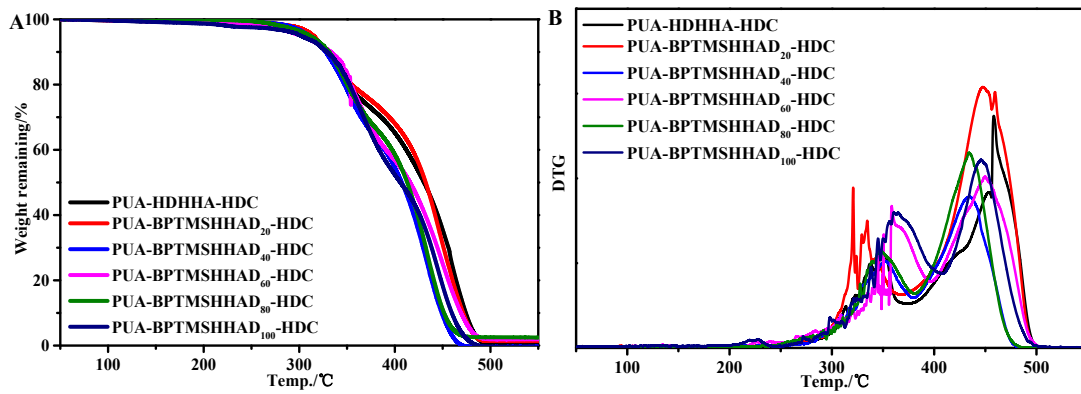

Fig. S6 TGA (A) and DTG (B) curves of PUAs from two diamide diols and HDC

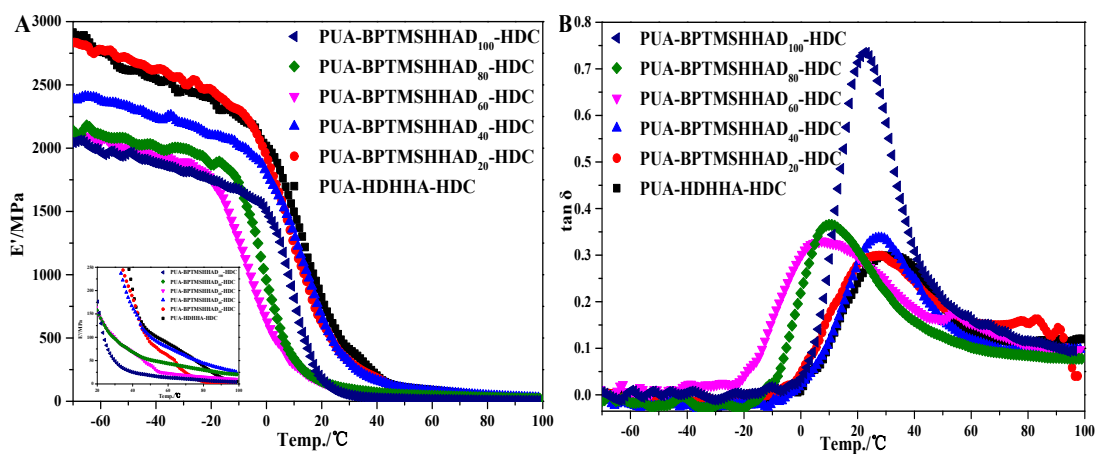

Fig. S7 DMA single frequency temperature sweep experiment for PUAs from two diamide diols (HDC and BPTMSHHA) and DHU: (A) Storage modulus (B)  $\tan \delta$

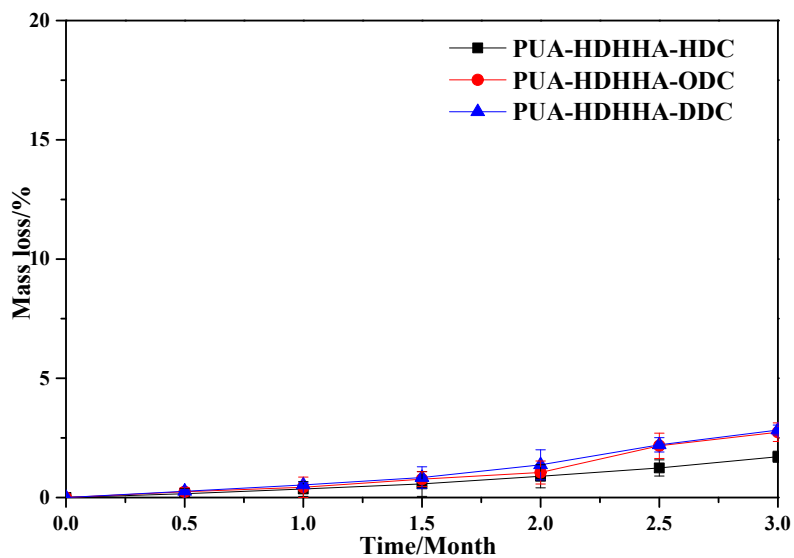

Fig. S8 Weight loss with time of immersion in phosphate buffer solution at 25 °C for PUAs
